# Supplementary material for: Time Course of Renal Transcriptomics after Subchronic Exposure to Ochratoxin A in Fisher Rats
Source: MDPI journal article supplement (doi:10.3390/toxins13030177), 2021-02-26
Supplement: s1 [file s1]

# Time Course of Renal Transcriptomics after Subchronic Exposure to Ochratoxin A in Fisher Rats

Laura Pastor, Ariane Vettorazzi, Elizabeth Guruceaga and López de Cerain A

**Table S1.** DEG obtained in F344 rats after OTA treatment (7 or 21 days) with logFC higher or lower than |1.5| that were exclusively modified in females.

| Gene Name              | Gene Description                                                      | LogFC  |         |
|------------------------|-----------------------------------------------------------------------|--------|---------|
|                        |                                                                       | 7 days | 21 days |
| <b>7 &amp; 21 days</b> |                                                                       |        |         |
| Akr1b7                 | aldo-keto reductase family 1, member B7                               | -2.99  | -5.37   |
| Cmtm2a                 | CKLF-like MARVEL transmembrane domain containing 2A                   | -1.61  | -1.96   |
| <b>7 days</b>          |                                                                       |        |         |
| Cxcl13                 | chemokine (C-X-C motif) ligand 13                                     | 1.52   |         |
| Bcl6                   | B-cell CLL/lymphoma 6                                                 | 1.60   |         |
| Alox15b                | arachidonate 15-lipoxygenase, type B                                  | 1.70   |         |
| <b>21 days</b>         |                                                                       |        |         |
| Nxpe2                  | neurexophilin and PC-esterase domain family, member 2                 |        | -3.44   |
| Spetex-2G              | Spetex-2G protein                                                     |        | -3.11   |
| Spetex-2H              | Spetex-2H protein                                                     |        | -3.09   |
| LOC102557499           | uncharacterized LOC102557499                                          |        | -3.02   |
| Spetex-2D              | Spetex-2D protein                                                     |        | -2.93   |
| LOC102547212           | disks large homolog 5-like                                            |        | -2.76   |
| Spetex-2E              | Spetex-2E protein                                                     |        | -2.69   |
| Spetex-2F              | Spetex-2F protein                                                     |        | -2.54   |
| LOC102547093           | uncharacterized LOC102547093                                          |        | -2.54   |
| LOC102549465           | disks large homolog 5-like                                            |        | -2.52   |
| Akap17b                | A kinase (PRKA) anchor protein 17B                                    |        | -2.50   |
| Ly6i                   | lymphocyte antigen 6 complex, locus I                                 |        | -2.45   |
| LOC102546376           | disks large homolog 5-like                                            |        | -2.44   |
| Adh6                   | alcohol dehydrogenase 6 (class V)                                     |        | -2.30   |
| Slc17a9                | solute carrier family 17 (vesicular nucleotide transporter), member 9 |        | -2.12   |
| Akr1c2                 | aldo-keto reductase family 1, member C2                               |        | -2.10   |
| Cntnap4                | contactin associated protein-like 4                                   |        | -2.05   |
| LOC498470              | similar to Spetex-2C protein                                          |        | -2.01   |
| Unc93a                 | unc-93 homolog A (C. elegans)                                         |        | -1.89   |
| LOC498465              | similar to RIKEN cDNA 1700001F09                                      |        | -1.84   |
| LOC680656              | hypothetical protein LOC680656                                        |        | -1.76   |
| Cnr1                   | cannabinoid receptor 1 (brain)                                        |        | -1.76   |
| Mall                   | mal, T-cell differentiation protein-like                              |        | -1.74   |
| Col24a1                | collagen, type XXIV, alpha 1                                          |        | -1.68   |
| Col17a1                | collagen, type XVII, alpha 1                                          |        | -1.57   |
| Sectm1b                | secreted and transmembrane 1B                                         |        | 1.76    |
| Fkbp5                  | FK506 binding protein 5                                               |        | 2.03    |
| Mybl1                  | myeloblastosis oncogene-like 1                                        |        | 2.34    |

**Table S2.** DEG obtained in F344 rats after OTA treatment (7 and 21 days) with logFC higher or lower than |1.5| that were exclusively modified in males.

| Gene Name              | Gene Description                                                 | LogFC  |         |
|------------------------|------------------------------------------------------------------|--------|---------|
|                        |                                                                  | 7 days | 21 days |
| <b>7 &amp; 21 days</b> |                                                                  |        |         |
| Cyp2c11                | cytochrome P450, subfamily 2, polypeptide 11                     | -1.96  | -4.43   |
| <b>7 days</b>          |                                                                  |        |         |
| Ucp1                   | uncoupling protein 1 (mitochondrial, proton carrier)             | -2.72  |         |
| Thrsp                  | thyroid hormone responsive                                       | -2.55  |         |
| Fabp4                  | fatty acid binding protein 4, adipocyte                          | -1.74  |         |
| Cml2                   | camello-like 2                                                   | 2.23   |         |
| <b>21 days</b>         |                                                                  |        |         |
| Slco1a1                | solute carrier organic anion transporter family, member 1a1      |        | -5.26   |
| Dhrs7                  | dehydrogenase/reductase (SDR family) member 7                    |        | -4.49   |
| LOC102550584           | hornerin-like                                                    |        | -3.18   |
| RGD1564999             | similar to isopentenyl-diphosphate delta isomerase 2             |        | -2.84   |
| Cyp2d1                 | cytochrome P450, family 2, subfamily d, polypeptide 1            |        | -2.35   |
| LOC100364391           | dehydrogenase/reductase (SDR family) member 7-like               |        | -2.27   |
| Cml3                   | camello-like 3                                                   |        | -2.15   |
| Cyp2d5                 | cytochrome P450, family 2, subfamily d, polypeptide 5            |        | -2.13   |
| Gc                     | group specific component                                         |        | -2.07   |
| Slc51b                 | solute carrier family 51, beta subunit                           |        | -2.02   |
| Oosp1                  | oocyte secreted protein 1                                        |        | -1.92   |
| Gucy1b2                | guanylate cyclase 1, soluble, beta 2                             |        | -1.74   |
| Tmem236                | transmembrane protein 236                                        |        | -1.71   |
| Anxa13                 | annexin A13                                                      |        | -1.69   |
| Nefm                   | neurofilament, medium polypeptide                                |        | -1.57   |
| Mlc1                   | megalencephalic leukoencephalopathy with subcortical cysts 1     |        | -1.57   |
| Slc22a22               | solute carrier family 22 (organic cation transporter), member 22 |        | -1.53   |
| Egr1                   | early growth response 1                                          |        | 1.53    |
| Cyp24a1                | cytochrome P450, family 24, subfamily a, polypeptide 1           |        | 1.54    |
| S100g                  | S100 calcium binding protein G                                   |        | 1.58    |
| Fam129a                | family with sequence similarity 129, member A                    |        | 1.66    |
| Clmp                   | CXADR-like membrane protein                                      |        | 1.81    |
